# Supplementary material for: Cobalt phenylenediacetate coordination polymers containing long-spanning dipyridyl ligands: rectangular grid, primitive cubic, and 5-connected Archimedean layered net topologies
Source: Royal Society of Chemistry journal article supplement (doi:10.1039/b925239h), 2010-01-01

## Supplementary Information

Cobalt Phenylenediacetate Dual-Ligand Coordination Polymers: Rectangular Grid, Primitive Cubic, and 5-Connected Archimedean Layered Net Topologies

Karyn M. Blake<sup>†</sup>, Lindsey L. Johnston<sup>†</sup>, Joseph H. Nettleman<sup>†</sup>, Ronald M. Supkowski<sup>‡</sup>,  
Robert L. LaDuca<sup>†\*</sup>

Figure S1. Stacking of coordination polymer layers in **1**.

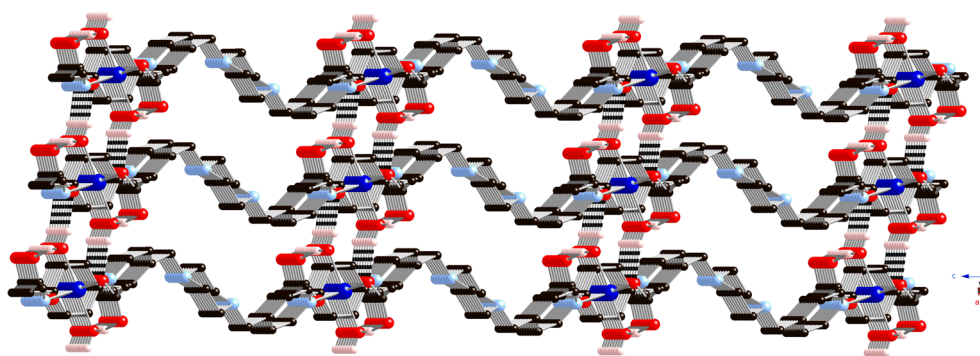

Figure S2. Stacking of coordination polymer layers in **3**. The unligated perchlorate ions,  $\text{H}_2\text{4-bmp}^{2+}$  cations, and water molecules of crystallization lie in the interlayer regions.

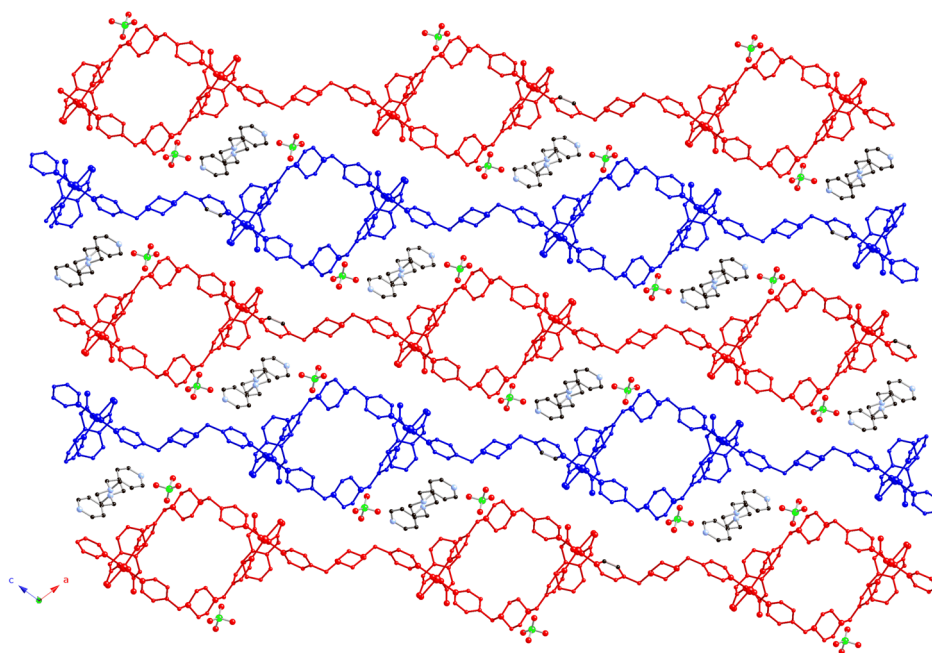

Figure S3. Inverse susceptibility plot for **2**. The black line represents the best fit to the Curie-Weiss Law.

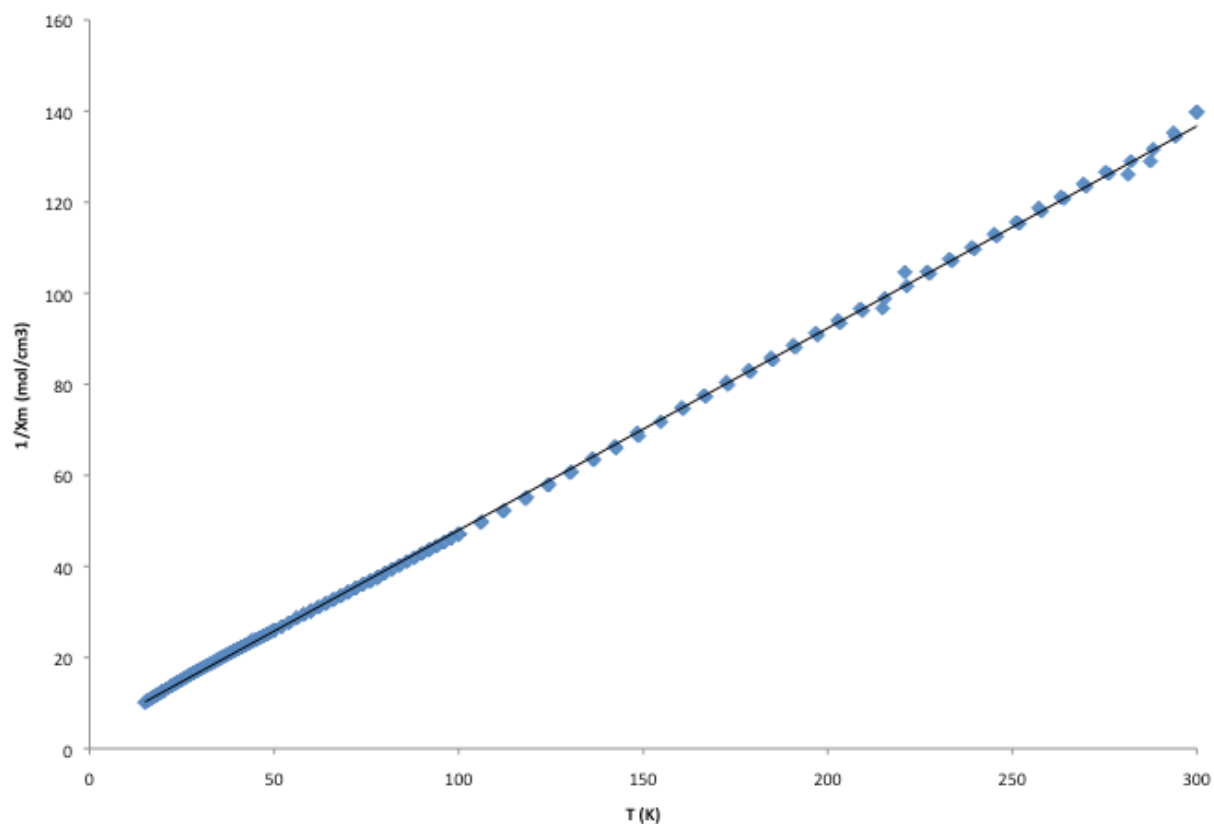

Figure S4. Thermogravimetric analysis plot for **2**.

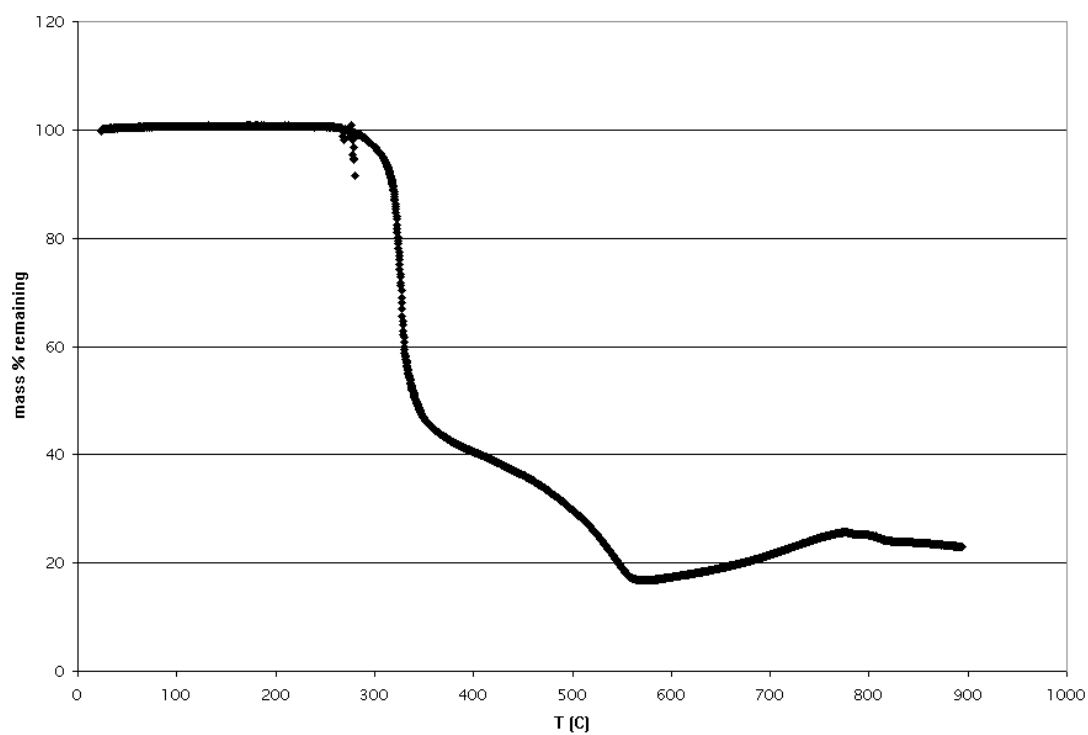

Supplement: b925239h.pdf [file b925239h.pdf]
